# Supplementary material for: Perception and Prioritization of Ecosystem Services from Bamboo Forest in Lao PDR: Case Study of Sangthong District
Source: MDPI journal article supplement (doi:10.3390/su132313060), 2021-11-25
Supplement: s1 [file s1]

# Perception and Prioritization of Ecosystem Service from Bamboo Forest in Lao PDR: Case Study of Sangthong District

Bohwi Lee

Department of Environment and Forest Resources, Chungnam National University, Daejeon 34134, Korea;  
bohwi00@gmail.com; Tel.: +82-10-4545-8795

**Table S1.** Population of 5 villages, Sangthong district in 2020 (unit: person, %)

| Classification | Study village |            |           |           |             | Total       |
|----------------|---------------|------------|-----------|-----------|-------------|-------------|
|                | Nongboua      | Nachalern  | Tao Hai   | Kuay      | Xor         |             |
| Population     | 423(100)      | 1,307(100) | 772(100)  | 653(100)  | 2,007(100)  | 5,162(100)  |
| Women          | 204(48.2)     | 662(50.7)  | 312(40.4) | 306(46.9) | 961(47.9)   | 2,445(47.4) |
| Men            | 219(51.8)     | 645(49.3)  | 460(59.6) | 347(52.1) | 1,046(52.6) | 2,717(52.6) |
| Household      | 86            | 275        | 159       | 179       | 407         | 1,106       |

Source: DOF, 2020, investigated by the local expert in 2020

**Table S2.** Land use of 5 villages in 2020 (unit: ha)

| Classification | Land use types              | Nong-boua      | Nachalern      | Tao Hai        | Kuay           | Xor          | Total           |
|----------------|-----------------------------|----------------|----------------|----------------|----------------|--------------|-----------------|
| <b>I</b>       | <b>Forest cover</b>         | <b>504.4</b>   | <b>592.3</b>   | <b>1,751.5</b> | <b>977</b>     | <b>3,196</b> | <b>7021.2</b>   |
| 1.1            | Village conservation forest | 80.0           | 192.7          | 1,074.9        | 342            | 320          | 2009.6          |
| 1.2            | Village protection forest   | 345            | 20             | 0              | 268            | 326          | 959             |
| 1.3            | Village utility forest      | 43             | 102.1          | 623.5          | 162            | 2,550        | 3,480.6         |
| 1.4            | Sacred forest               | 18             | 17.            | 53             | -              | -            | 88              |
| 1.5            | Plantation                  | 18.4           | 260.5          | 1,112          | 205            | -            | 1,595.9         |
| <b>II</b>      | <b>Agriculture land</b>     | <b>599.5</b>   | <b>747.2</b>   | <b>1,434.6</b> | <b>1,398</b>   | <b>3,930</b> | <b>8,109.3</b>  |
| 2.1            | Paddy field                 | 378            | 296            | 388            | 575            | 400          | 2,037           |
| 2.2            | Shifting cultivation        | 24.3           | 40.6           | 30             | 592            | 3,420        | 4,106.9         |
| 2.3            | Garden and other uses       | 16.5           | 21.9           | 620            | -              | 70           | 728.4           |
| 2.4            | Rangeland                   | 180.7          | 388.8          | 396.6          | 231            | 40           | 1,237.1         |
| <b>III</b>     | <b>Settlement area</b>      | <b>32.</b>     | <b>15.7</b>    | <b>15.4</b>    | <b>14.3</b>    | <b>27</b>    | <b>104.4</b>    |
| <b>IV</b>      | <b>Other land use</b>       | <b>-</b>       | <b>-</b>       | <b>-</b>       | <b>38.8</b>    | <b>1,373</b> | <b>1,411.8</b>  |
| <b>Total</b>   |                             | <b>1,135.9</b> | <b>1,355.1</b> | <b>3,201.5</b> | <b>2,428.1</b> | <b>8,526</b> | <b>16,646.6</b> |

Source: DOF, 2020, investigated by the local expert in 2020

Table S3. Interviewer information

| Gender | Affiliation                                      | Education     | Career associated with ES |
|--------|--------------------------------------------------|---------------|---------------------------|
| Women  | Provincial Agriculture and Forestry Office, Laos | Undergraduate | < 3 years                 |
| Men    | Department of Forestry, Laos                     |               | 3 – 5 years               |
|        | Department of Forestry, Laos                     |               | 3 – 5 years               |

### **Public Priority Survey of Ecosystem Service for Different Land-Use Types**

**[Community group or smallholder farmer]**

#### **1. Priority of ecosystem service (ES) with respect to land-use types**

##### **1-1. Ecosystem service (ES) provided from bamboo forest**

- ✓ **In your opinion, which ecosystem service type from bamboo forest is more important for you?**
- Please score priorities of ecosystem services from bamboo forest on 100-points scale.
  - Close to '100' indicates more important for your life; close to '10' indicates less important; and '0' indicates not important at all.
  - The summation of all points for ecosystem service types should be 100 points.

| Ecosystem Service type                   | 100 preference points |    |    |    |    |    |    |    |    |    |     |
|------------------------------------------|-----------------------|----|----|----|----|----|----|----|----|----|-----|
|                                          | 0                     | 10 | 20 | 30 | 40 | 50 | 60 | 70 | 80 | 90 | 100 |
| Food                                     |                       |    |    |    |    |    |    |    |    |    |     |
| Raw materials supply                     |                       |    |    |    |    |    |    |    |    |    |     |
| Bioenergy                                |                       |    |    |    |    |    |    |    |    |    |     |
| Timber                                   |                       |    |    |    |    |    |    |    |    |    |     |
| Freshwater                               |                       |    |    |    |    |    |    |    |    |    |     |
| Natural hazard regulation                |                       |    |    |    |    |    |    |    |    |    |     |
| Soil erosion                             |                       |    |    |    |    |    |    |    |    |    |     |
| Water purification                       |                       |    |    |    |    |    |    |    |    |    |     |
| Air quality and local climate regulation |                       |    |    |    |    |    |    |    |    |    |     |
| Landscape beauty                         |                       |    |    |    |    |    |    |    |    |    |     |
| Cultural/religious values                |                       |    |    |    |    |    |    |    |    |    |     |
| Habitat for species                      |                       |    |    |    |    |    |    |    |    |    |     |
| Biodiversity                             |                       |    |    |    |    |    |    |    |    |    |     |

Figure S1. The questionnaire form of 100 preference points for priority survey

**Table S4.** List of ES from bamboo forest identified in Sanghtong district. Ecosystem services based on TEEB categories.

| Ecosystem service category | Important ES lists identified by literature reviews | Description of bamboo forests*                                                                                                                                                                                | Beneficiary/Use*   |
|----------------------------|-----------------------------------------------------|---------------------------------------------------------------------------------------------------------------------------------------------------------------------------------------------------------------|--------------------|
| Provisioning service       | Food                                                | Provides foods especially edible and palatable shoots                                                                                                                                                         | Public/<br>Private |
|                            | Raw materials                                       | Provides various type of raw materials (e.g. housing, flooring, craft and fiber, and bamboo splits for chopstick)                                                                                             | Public/<br>Private |
|                            | Bioenergy                                           | Substitutes for wood charcoal and mineral coal, thus replacing fossil fuels and decreasing the carbon footprint                                                                                               | Private            |
|                            | Timber                                              | Provides construction timber (e.g., building raw materials)                                                                                                                                                   | Private            |
|                            | Medicine                                            | Provides traditionally medicine                                                                                                                                                                               | Public/<br>Private |
|                            | Freshwater                                          | Helps protect water source and freshwater supply                                                                                                                                                              | Public/<br>Private |
| Regulating service         | Carbon sequestration                                | Grows fast and can sequesterate carbon from atmosphere over tree. Over 90% of bamboo carbon can be sequestered in durable products such as boards, panels, and activated charcoal                             | Public             |
|                            | Natural hazard control                              | The complex root network controls flooding and landslides by holding soil particles together                                                                                                                  | Public             |
|                            | Soil erosion                                        | Stabilizes slopes and prevents soil erosion and decrease the deposition load downstream                                                                                                                       | Public/<br>Private |
|                            | Water purification                                  | Filters out and decompose organic waste from land and water. And it can assimilate and detoxify compounds of soil and subsoil                                                                                 | Public/<br>Private |
|                            | Air quality and local climate regulation            | Filters the air and remove odors and dust particles out of the air through the action of leaves and bark. Improved air quality makes the local climate better through the action of leaves and bark of bamboo | Public             |

|                  |                                    |                                                                                                                                                                                                                                                                                     |        |
|------------------|------------------------------------|-------------------------------------------------------------------------------------------------------------------------------------------------------------------------------------------------------------------------------------------------------------------------------------|--------|
| Cultural service | Cultural/<br>religious value       | Provides materials for religious and cultural purposes.<br>Traditionally, the Laos people use intricately woven bamboo mats and incense stick in temple (wat). Most live in rural villages around a temple, temple or house often constructed entirely from woven bamboo thatching. | Public |
|                  | Landscape beauty                   | Prevents land degradation and enhances landscape restoration and greenery.                                                                                                                                                                                                          | Public |
| Habitat service  | Habitat provision                  | Provides suitable habitats for different species (flora and fauna).                                                                                                                                                                                                                 | Public |
|                  | Biodiversity<br>(focusing species) | Maintains major bamboo species by promoting different varieties and providing a habitat for wild animals.                                                                                                                                                                           | Public |

Note: \* Based on [28]

**Table S5.** Community (n = 500) public perception result of ES from bamboo forest

| ES categories  |                                          | No current use (A) |      | Little current use (B) |      | Moderate current use (C) |      | High current use (D) |      | Total NO (A+B) <sup>1</sup> |      | Total YES (C+D) <sup>2</sup> |      | Final selection |
|----------------|------------------------------------------|--------------------|------|------------------------|------|--------------------------|------|----------------------|------|-----------------------------|------|------------------------------|------|-----------------|
|                |                                          | N                  | %    | N                      | %    | N                        | %    | N                    | %    | N                           | %    | N                            | %    |                 |
| P <sup>3</sup> | Food                                     | 26                 | 5.2  | 9                      | 1.8  | 89                       | 17.8 | 376                  | 75.2 | 35                          | 7    | 465                          | 93.0 | O               |
|                | Raw materials                            | 27                 | 5.4  | 30                     | 6    | 157                      | 31.4 | 286                  | 57.2 | 57                          | 11.4 | 443                          | 88.6 | O               |
|                | Bioenergy                                | 61                 | 12.2 | 163                    | 32.6 | 147                      | 29.4 | 129                  | 25.8 | 224                         | 44.8 | 276                          | 55.2 | O               |
|                | Timber                                   | 98                 | 19.6 | 67                     | 13.4 | 142                      | 28.4 | 193                  | 38.6 | 165                         | 33   | 335                          | 67.0 | O               |
|                | Medicine                                 | 379                | 75.8 | 32                     | 6.4  | 56                       | 11.2 | 33                   | 6.6  | 411                         | 82.2 | 89                           | 17.8 | X               |
|                | Freshwater                               | 70                 | 14   | 61                     | 12.2 | 160                      | 32   | 209                  | 41.8 | 131                         | 26.2 | 369                          | 73.8 | O               |
| R              | Carbon sequestration                     | 264                | 52.8 | 66                     | 13.2 | 73                       | 14.6 | 97                   | 19.4 | 330                         | 66   | 170                          | 34.0 | X               |
|                | Natural hazard regulation                | 38                 | 7.6  | 62                     | 12.4 | 183                      | 36.6 | 217                  | 43.4 | 100                         | 20   | 400                          | 80.0 | O               |
|                | Soil erosion                             | 25                 | 5    | 84                     | 16.8 | 168                      | 33.6 | 223                  | 44.6 | 109                         | 21.8 | 391                          | 78.2 | O               |
|                | Water purification                       | 69                 | 13.8 | 55                     | 11   | 148                      | 29.6 | 228                  | 45.6 | 124                         | 24.8 | 376                          | 75.2 | O               |
|                | Air quality and local climate regulation | 18                 | 3.6  | 30                     | 6    | 114                      | 22.8 | 338                  | 67.6 | 48                          | 9.6  | 452                          | 90.4 | O               |
| C              | Landscape beauty                         | 11                 | 2.2  | 21                     | 4.2  | 95                       | 19   | 373                  | 74.6 | 32                          | 6.4  | 468                          | 93.6 | O               |
|                | Cultural/religious values                | 60                 | 12   | 133                    | 26.6 | 172                      | 34.4 | 135                  | 27   | 193                         | 38.6 | 307                          | 61.4 | O               |
| H              | Habitat for species                      | 40                 | 8    | 92                     | 18.4 | 221                      | 44.2 | 147                  | 29.4 | 132                         | 26.4 | 368                          | 73.6 | O               |
|                | Biodiversity                             | 32                 | 6.4  | 81                     | 16.2 | 198                      | 39.6 | 189                  | 37.8 | 113                         | 22.6 | 387                          | 77.4 | O               |

<sup>1</sup> A+B indicates the sum of negative responses (1 = no use, 2 = little use)<sup>2</sup> C+D indicates the sum of positive responses (3 = moderate use, 4 = high use)<sup>3</sup> P: Provisioning service, R: Regulating service, C: Cultural service, H: Habitat service

**Table S6.** Expert (n = 30) public perception result of ES from bamboo forest

| ES categories |                                          | No          |      | Little      |      | Moderate    |      | High        |      | Total NO |      | Total YES |      | Final selection |
|---------------|------------------------------------------|-------------|------|-------------|------|-------------|------|-------------|------|----------|------|-----------|------|-----------------|
|               |                                          | current use |      | current use |      | current use |      | current use |      | (A+B)    |      | (C+D)     |      |                 |
|               |                                          | (A)         |      | (B)         |      | (C)         |      | (D)         |      |          |      |           |      |                 |
|               |                                          | N           | %    | N           | %    | N           | %    | N           | %    | N        | %    | N         | %    |                 |
| P             | Food                                     | 0           | 0.0  | 0           | 0.0  | 0           | 0.0  | 30          | 100  | 0        | 0.0  | 30        | 100  | O               |
|               | Raw materials                            | 0           | 0.0  | 0           | 0.0  | 10          | 33.3 | 20          | 66.7 | 0        | 0.0  | 30        | 100  | O               |
|               | Bioenergy                                | 0           | 0.0  | 10          | 33.3 | 15          | 50.0 | 5           | 16.7 | 10       | 33.3 | 20        | 66.7 | O               |
|               | Timber                                   | 0           | 0.0  | 14          | 46.7 | 14          | 46.7 | 2           | 6.7  | 14       | 46.7 | 16        | 53.3 | O               |
|               | Medicine                                 | 10          | 33.3 | 12          | 40.0 | 8           | 26.7 | 0           | 0.0  | 22       | 73.3 | 8         | 26.7 | X               |
|               | Freshwater                               | 0           | 0.0  | 10          | 33.3 | 17          | 56.7 | 3           | 10.0 | 10       | 33.3 | 20        | 66.7 | O               |
| R             | Carbon sequestration                     | 0           | 0.0  | 8           | 26.7 | 22          | 73.3 | 0           | 0.0  | 8        | 26.7 | 22        | 73.3 | O               |
|               | Natural hazard regulation                | 0           | 0.0  | 16          | 53.3 | 13          | 43.3 | 1           | 3.3  | 16       | 53.3 | 14        | 46.7 | X               |
|               | Soil erosion                             | 0           | 0.0  | 3           | 10.0 | 16          | 53.3 | 11          | 36.7 | 3        | 10.0 | 27        | 90.0 | O               |
|               | Water purification                       | 0           | 0.0  | 7           | 23.3 | 16          | 53.3 | 7           | 23.3 | 7        | 23.3 | 23        | 76.7 | O               |
|               | Air quality and local climate regulation | 0           | 0.0  | 0           | 0.0  | 16          | 53.3 | 14          | 46.7 | 0        | 0.0  | 30        | 100  | O               |
| C             | Landscape beauty                         | 0           | 0.0  | 0           | 0.0  | 6           | 20.0 | 24          | 80.0 | 0        | 0.0  | 30        | 100  | O               |
|               | Cultural/religious values                | 0           | 0.0  | 9           | 30.0 | 13          | 43.3 | 8           | 26.7 | 9        | 30.0 | 21        | 70.0 | O               |
| H             | Habitat for species                      | 0           | 0.0  | 12          | 40.0 | 18          | 60.0 | 0           | 0.0  | 12       | 40.0 | 18        | 60.0 | O               |
|               | Biodiversity                             | 0           | 0.0  | 7           | 23.3 | 15          | 50.0 | 8           | 26.7 | 7        | 23.3 | 23        | 76.7 | O               |

**Table S7.** Mann-Whitney test result of prioritizing bamboo ES for stakeholder groups

| ES category          |                           | Stakeholder group | Mean Rank | p-value |
|----------------------|---------------------------|-------------------|-----------|---------|
| Provisioning service | Food                      | Community         | 790.83    | 0.060   |
|                      |                           | Expert            | 873.28    |         |
|                      | Raw_material              | Community         | 809.96    | 0.000*  |
|                      |                           | Expert            | 554.51    |         |
|                      | Bioenergy                 | Community         | 784.50    | 0.063   |
|                      |                           | Expert            | 680.47    |         |
|                      | Timber                    | Community         | 794.55    | 0.865   |
|                      |                           | Expert            | 802.51    |         |
|                      | Freshwater                | Community         | 792.32    | 0.045*  |
|                      |                           | Expert            | 848.56    |         |
| Regulating service   | Medicine                  | Community         | 791.44    | 0.085   |
|                      |                           | Expert            | 863.14    |         |
|                      | Natural_hazard_regulation | Community         | 800.72    | 0.042*  |
|                      |                           | Expert            | 708.54    |         |
|                      | Soil_erosion              | Community         | 790.52    | 0.058   |
|                      |                           | Expert            | 860.67    |         |
|                      | Water_purification        | Community         | 804.24    | 0.000*  |
|                      |                           | Expert            | 649.88    |         |
|                      | Fresh_air_regualtion      | Community         | 802.95    | 0.000*  |
|                      |                           | Expert            | 653.89    |         |
| Cultural service     | Carbon_sequstration       | Community         | 765.50    | 0.000*  |
|                      |                           | Expert            | 1295.50   |         |
|                      | Landscape_beauty          | Community         | 798.35    | 0.254   |
|                      |                           | Expert            | 748.08    |         |
| Habitat service      | Cultural_religious_values | Community         | 795.68    | 0.943   |
|                      |                           | Expert            | 792.49    |         |
|                      | Habitat for species       | Community         | 793.78    | 0.364   |
|                      |                           | Expert            | 824.17    |         |
|                      | Biodiversity              | Community         | 792.76    | 0.360   |
|                      |                           | Expert            | 823.39    |         |

\* $p < 0.05$ .
